# Supplementary material for: Predicting Landscape-Genetic Consequences of Habitat Loss, Fragmentation and Mobility for Multiple Species of Woodland Birds
Source: PubMed Central journal article supplement (PMC3281894; doi:10.1371/journal.pone.0030888), 2012-02-17
Supplement: pone.0030888.s002.pdf [file pone.0030888.s002.pdf]

Table S1 AICc values and change point threshold in tree-cover for species' incidence model fitting.

| Species                  | Model |        |      |           |       |              |              | Change Point threshold value (%) |
|--------------------------|-------|--------|------|-----------|-------|--------------|--------------|----------------------------------|
|                          | Null  | Linear | Log  | Quadratic | Power | Broken stick | Change point |                                  |
| Brown Treecreeper        | 10.5  | 12.2   | 8.1  | 4.9       | 9.3   | 5.4          | 7.9          | NA                               |
| Eastern Yellow Robin     | 26.0  | 4.1    | 13.6 | 5.5       | 6.6   | 7.3          | 5.1          | NA                               |
| Fuscous Honeyeater       | 25.5  | 7.2    | 11.9 | 7.4       | 9.0   | 9.4          | 6.4          | 17.0                             |
| Grey Shrike-thrush       | 24.8  | 25.3   | 17.4 | 17.9      | 15.7  | 14.9         | 12.9         | 5.2                              |
| Superb Fairy-wren        | 7.5   | 2.8    | 2.4  | 4.5       | 4.9   | 7.1          | 1.9          | 18.1                             |
| Spotted Pardalote        | 22.8  | 3.7    | 4.2  | 1.2       | 3.6   | 4.1          | -2.0         | 11.7                             |
| Striated Pardalote       | 4.0   | 4.7    | 3.8  | 6.7       | 6.7   | 8.0          | 3.3          | 9.9                              |
| Weebill                  | 13.2  | 5.8    | 3.0  | 7.0       | 5.9   | 7.8          | 2.7          | 8.4                              |
| White-plumed Honeyeater  | 5.9   | 8.4    | 8.0  | 7.5       | 9.9   | 7.0          | 6.1          | NA                               |
| Yellow-tufted Honeyeater | 27.5  | 8.1    | 22.6 | 11.0      | 11.1  | 10.6         | -4.4         | 7.8                              |
