# Supplementary material for: Predicting Landscape-Genetic Consequences of Habitat Loss, Fragmentation and Mobility for Multiple Species of Woodland Birds
Source: PubMed Central journal article supplement (PMC3281894; doi:10.1371/journal.pone.0030888), 2012-02-17
Supplement: pone.0030888.s004.pdf [file pone.0030888.s004.pdf]

**Table S3 Mean correlation between and credible intervals for isolation models.**

| Model/Resistance Surface                            | Isolation-by-resistance\ Circuitscape vs |                      |                      | Least-cost distance vs |                          |
|-----------------------------------------------------|------------------------------------------|----------------------|----------------------|------------------------|--------------------------|
|                                                     | UNIFORM                                  | GEOG                 | logGEOG              | GEOG                   | Isolation- by resistance |
| Correlation of Uniform/Isolation by distance Models |                                          |                      |                      |                        |                          |
| UNIFORM                                             |                                          | 0.97 (0.902, 0.993)  | 0.903 (0.868, 0.937) | 0.998 (0.997, 0.999)   |                          |
| GEOG                                                |                                          |                      | 0.809 (0.653, 0.927) |                        |                          |
| logGEOG                                             |                                          |                      |                      | 0.807 (0.638, 0.926)   |                          |
| Generic Treecover Models                            |                                          |                      |                      |                        |                          |
| TREE_25_10                                          | 0.477 (0.088, 0.791)                     | 0.474 (0.095, 0.784) | 0.425 (0.051, 0.734) | 0.927 (0.889, 0.958)   | 0.571                    |
| TREE_25_100                                         | 0.327 (0.012, 0.697)                     | 0.331 (0.012, 0.702) | 0.294 (0.006, 0.632) | 0.881 (0.822, 0.929)   | 0.419                    |
| TREE_25_2                                           | 0.818 (0.595, 0.937)                     | 0.801 (0.586, 0.926) | 0.737 (0.487, 0.891) | 0.989 (0.982, 0.994)   | 0.862                    |
| TREE_25_5                                           | 0.577 (0.188, 0.837)                     | 0.57 (0.193, 0.833)  | 0.515 (0.135, 0.785) | 0.949 (0.922, 0.971)   | 0.666                    |
| Sedentary decliners                                 |                                          |                      |                      |                        |                          |
| BTC_EO_100                                          | 0.991 (0.976, 0.997)                     | 0.966 (0.908, 0.992) | 0.905 (0.845, 0.958) | 0.999 (0.998, 0.999)   | 0.964                    |
| BTC_EO_5000                                         | 0.636 (0.229, 0.926)                     | 0.638 (0.25, 0.92)   | 0.575 (0.157, 0.844) | 0.918 (0.876, 0.955)   | 0.734                    |
| BTC_HAB_10                                          | 0.827 (0.577, 0.959)                     | 0.831 (0.608, 0.957) | 0.751 (0.491, 0.907) | 0.921 (0.875, 0.96)    | 0.825                    |
| BTC_HAB_2                                           | 0.961 (0.902, 0.991)                     | 0.943 (0.871, 0.984) | 0.874 (0.784, 0.945) | 0.994 (0.99, 0.997)    | 0.944                    |
| EYR_EO_100                                          | 0.979 (0.945, 0.994)                     | 0.955 (0.892, 0.987) | 0.893 (0.823, 0.952) | 0.998 (0.997, 0.999)   | 0.956                    |
| EYR_EO_5000                                         | 0.236 (0, 0.788)                         | 0.241 (0, 0.815)     | 0.214 (0.001, 0.704) | 0.817 (0.724, 0.889)   | 0.442                    |
| EYR_HAB_10                                          | 0.469 (0.078, 0.787)                     | 0.461 (0.077, 0.783) | 0.416 (0.05, 0.729)  | 0.908 (0.857, 0.948)   | 0.541                    |
| EYR_HAB_2                                           | 0.816 (0.61, 0.939)                      | 0.796 (0.58, 0.925)  | 0.735 (0.51, 0.889)  | 0.985 (0.977, 0.992)   | 0.850                    |
| SFW_EO_100                                          | 0.987 (0.966, 0.996)                     | 0.962 (0.904, 0.99)  | 0.901 (0.837, 0.955) | 0.998 (0.998, 0.999)   | 0.961                    |
| SFW_EO_5000                                         | 0.254 (0, 0.889)                         | 0.258 (0, 0.909)     | 0.232 (0, 0.826)     | 0.845 (0.779, 0.9)     | 0.120                    |
| SFW_HAB_10                                          | 0.587 (0.214, 0.841)                     | 0.591 (0.221, 0.845) | 0.539 (0.142, 0.791) | 0.905 (0.853, 0.947)   | 0.652                    |
| SFW_HAB_2                                           | 0.891 (0.746, 0.963)                     | 0.877 (0.724, 0.961) | 0.814 (0.649, 0.919) | 0.99 (0.984, 0.995)    | 0.896                    |
| Intermediate/Equivocal Decliner                     |                                          |                      |                      |                        |                          |
| GST_EO_100                                          | 0.991 (0.976, 0.998)                     | 0.966 (0.908, 0.992) | 0.905 (0.845, 0.958) | 0.999 (0.998, 0.999)   | 0.964                    |
| GST_EO_5000                                         | 0.624 (0.204, 0.923)                     | 0.627 (0.227, 0.919) | 0.565 (0.135, 0.842) | 0.913 (0.868, 0.952)   | 0.736                    |
| GST_HAB_10                                          | 0.596 (0.198, 0.86)                      | 0.597 (0.205, 0.869) | 0.545 (0.155, 0.808) | 0.895 (0.838, 0.941)   | 0.681                    |
| GST_HAB_2                                           | 0.891 (0.722, 0.969)                     | 0.874 (0.694, 0.961) | 0.814 (0.633, 0.919) | 0.989 (0.982, 0.994)   | 0.905                    |
| SPP_HAB_10                                          | 0.516 (0.112, 0.842)                     | 0.519 (0.123, 0.853) | 0.468 (0.078, 0.765) | 0.906 (0.85, 0.947)    | 0.611                    |
| SPP_HAB_2                                           | 0.861 (0.688, 0.965)                     | 0.844 (0.672, 0.959) | 0.783 (0.58, 0.907)  | 0.986 (0.978, 0.992)   | 0.884                    |
| WB_EO_100                                           | 0.989 (0.973, 0.997)                     | 0.905 (0.846, 0.958) | 0.964 (0.893, 0.99)  | 0.999 (0.998, 0.999)   | 0.963                    |
| WB_EO_5000                                          | 0.595 (0.163, 0.927)                     | 0.598 (0.166, 0.927) | 0.542 (0.1, 0.857)   | 0.903 (0.855, 0.946)   | 0.727                    |
| WB_HAB_10                                           | 0.599 (0.195, 0.899)                     | 0.606 (0.193, 0.913) | 0.544 (0.145, 0.837) | 0.892 (0.832, 0.94)    | 0.715                    |
| WB_HAB_2                                            | 0.899 (0.729, 0.979)                     | 0.886 (0.714, 0.966) | 0.816 (0.645, 0.923) | 0.99 (0.984, 0.995)    | 0.917                    |
| Mobile Decliners                                    |                                          |                      |                      |                        |                          |
| FH_EO_100                                           | 1 (1, 1)                                 | 0.974 (0.913, 0.996) | 0.915 (0.865, 0.963) | 0.998 (0.997, 0.999)   | 0.969                    |
| FH_EO_5000                                          | 0.688 (0.304, 0.935)                     | 0.685 (0.322, 0.926) | 0.62 (0.234, 0.855)  | 0.944 (0.914, 0.97)    | 0.762                    |
| FH_HAB_10                                           | 0.652 (0.281, 0.932)                     | 0.651 (0.28, 0.929)  | 0.583 (0.2, 0.857)   | 0.907 (0.855, 0.951)   | 0.681                    |
| FH_HAB_2                                            | 0.918 (0.798, 0.983)                     | 0.899 (0.77, 0.974)  | 0.826 (0.674, 0.922) | 0.986 (0.978, 0.992)   | 0.908                    |
| YTH_EO_100                                          | 1 (1, 1)                                 | 0.974 (0.913, 0.996) | 0.915 (0.865, 0.963) | 0.998 (0.997, 0.999)   | 0.969                    |
| YTH_EO_5000                                         | 0.641 (0.24, 0.937)                      | 0.641 (0.237, 0.936) | 0.581 (0.165, 0.861) | 0.924 (0.883, 0.958)   | 0.750                    |
| YTH_HAB_10                                          | 0.631 (0.231, 0.948)                     | 0.63 (0.233, 0.941)  | 0.567 (0.145, 0.878) | 0.904 (0.849, 0.948)   | 0.696                    |
| YTH_HAB_2                                           | 0.914 (0.786, 0.985)                     | 0.895 (0.764, 0.977) | 0.826 (0.661, 0.925) | 0.989 (0.983, 0.994)   | 0.913                    |
| Mobile Tolerant                                     |                                          |                      |                      |                        |                          |
| WPH_EO_100                                          | 1 (1, 1)                                 | 0.974 (0.912, 0.996) | 0.915 (0.865, 0.963) | 0.998 (0.997, 0.999)   | 0.969                    |
| WPH_EO_5000                                         | 0.784 (0.504, 0.957)                     | 0.772 (0.492, 0.952) | 0.709 (0.413, 0.891) | 0.974 (0.96, 0.985)    | 0.818                    |
| WPH_HAB_10                                          | 0.795 (0.551, 0.936)                     | 0.801 (0.567, 0.944) | 0.732 (0.47, 0.888)  | 0.944 (0.912, 0.973)   | 0.828                    |
| WPH_HAB_2                                           | 0.957 (0.894, 0.988)                     | 0.942 (0.867, 0.984) | 0.876 (0.79, 0.951)  | 0.996 (0.993, 0.998)   | 0.947                    |
| Mean                                                | 0.75                                     | 0.736                | 0.680                | 0.949                  | 0.782                    |

Lower and Upper 95% credible intervals are given in brackets after mean pearson R<sup>2</sup>
